# Supplementary material for: Improved electrode kinetics of a modified Na3V2(PO4)3 cathode through Zr substitution and nitrogen-doped carbon coating towards robust electrochemical performance at low temperature
Source: Royal Society of Chemistry journal article supplement (doi:10.1039/d2qi01137a), 2022-01-01
Supplement: d2qi01137a1.pdf [file d2qi01137a1.pdf]

## Supporting Information

### **Improved Electrode Kinetics of Modified $\text{Na}_3\text{V}_2(\text{PO}_4)_3$ Cathode through Zr Substitution and Nitrogen-Doped Carbon Coating towards Robust Electrochemical Performance at Low Temperature**

Jiabao Li<sup>\*a</sup>, Ziqian Li<sup>a</sup>, Shaocong Tang<sup>a</sup>, Jingjing Hao<sup>a</sup>, Tianyi Wang<sup>a</sup>, Chengyin Wang<sup>\*a</sup>,  
Likun Pan<sup>\*b</sup>

<sup>a</sup>School of Chemistry and Chemical Engineering, Yangzhou University

180 Si-Wang-Ting Road, Yangzhou, Jiangsu 225002, China

E-mail: jiabaoli@yzu.edu.cn (Jiabao Li); wangcy@yzu.edu.cn (Chengyin Wang)

<sup>b</sup>Shanghai Key Laboratory of Magnetic Resonance, School of Physics and Electronic Science, East China Normal University

No. 500 Dongchuan Road, Shanghai 200241, P. R. China

E-mail: lkpan@phy.ecnu.edu.cn (Likun Pan)

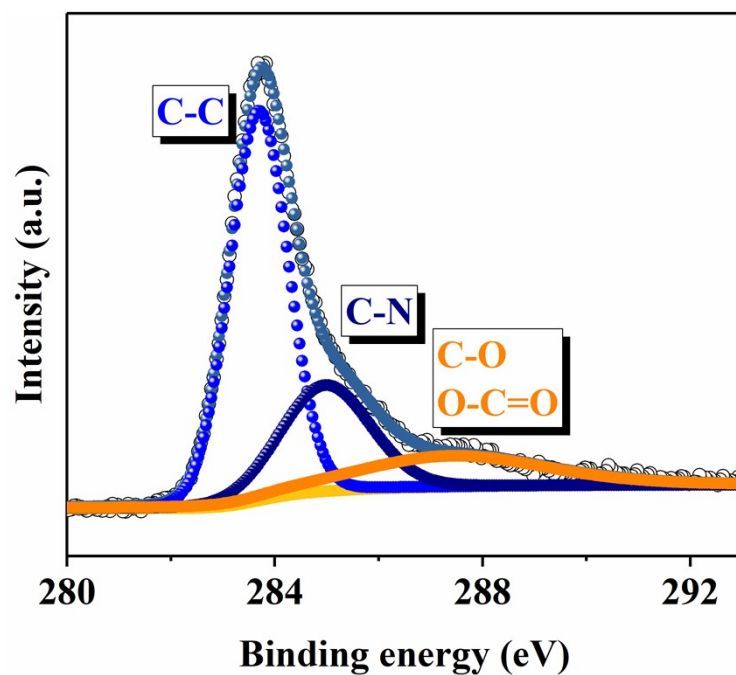

Fig. S1 High-resolution C 1s spectra of 0.1Zr-NVP/NC.

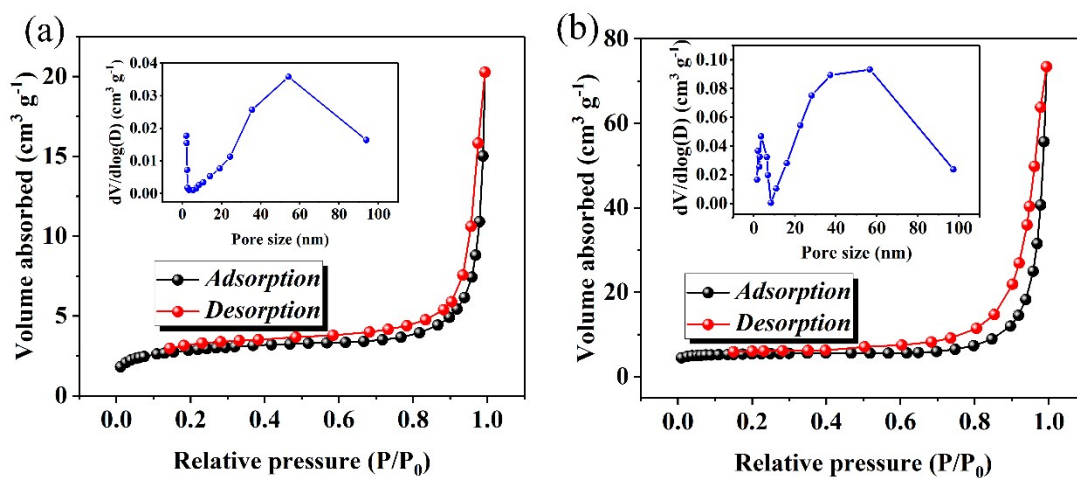

Fig. S2 N<sub>2</sub> adsorption/desorption isotherms (a) and pore size distribution curves (b) of NVP/NC and 0.1Zr-NVP/NC.

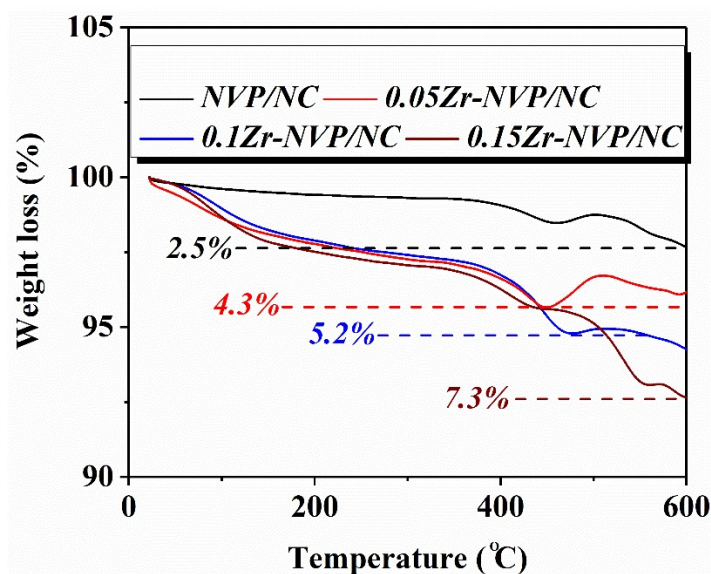

Fig. S3 TGA curves of the NVP/NC, 0.05Zr-NVP/NC, 0.1Zr-NVP/NC and 0.15Zr-NVP/NC.

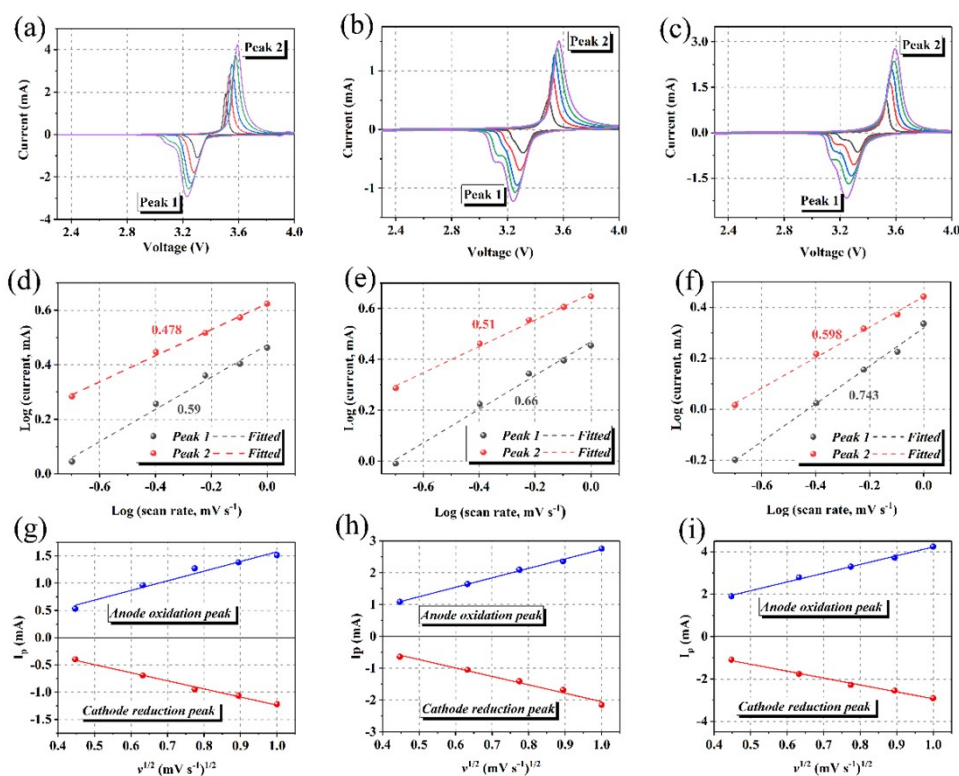

Fig. S4 CV curves ranging from 0.2 to 1.0  $\text{mV s}^{-1}$ , fitted b values of  $\log(i)$  versus  $\log(v)$ , and the relationship between the square root of the scan rate and peak current of NVP/NC (a, d and g), 0.05Zr-NVP/NC (b, e and h) and 0.15Zr-NVP/NC (c, f and i).

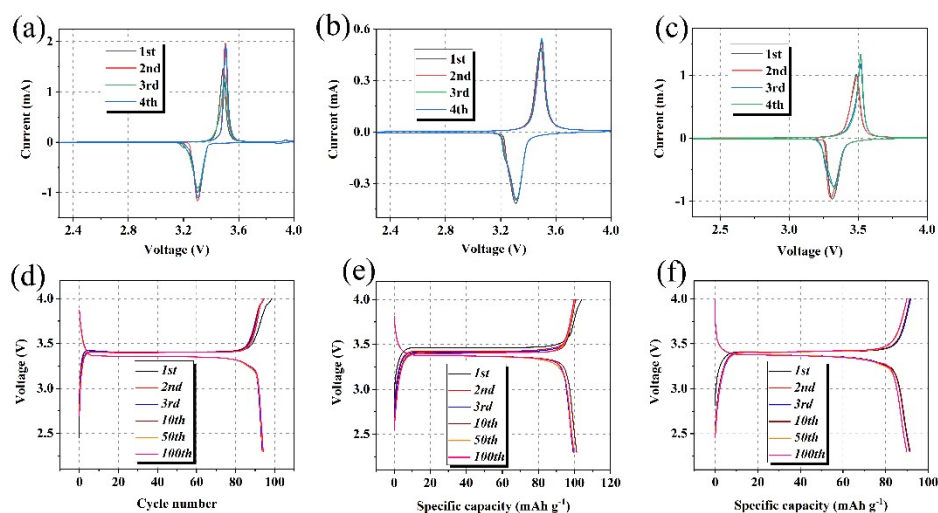

Fig. S5 The CV curves at 0.2 mV s<sup>-1</sup> ranging from 2.3 to 4.0 V and discharge/charge profiles at 0.1 A g<sup>-1</sup> for NVP/NC (a and d), 0.05Zr-NVP/NC (b and e) and 0.15Zr-NVP/NC (c and f).

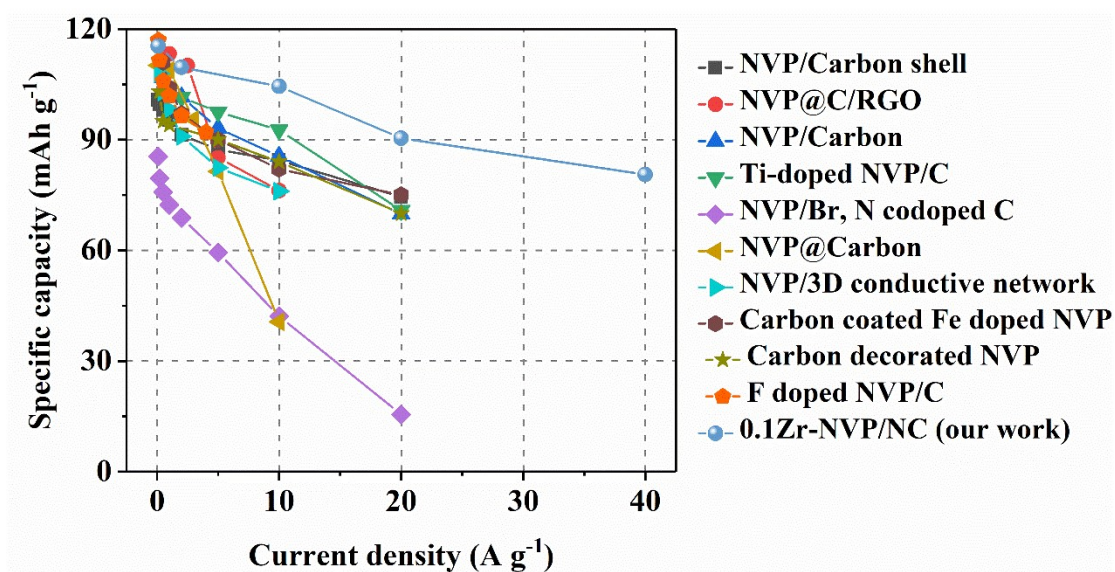

Fig. S6 The comparison of rate capabilities between the as-prepared 0.1Zr-NVP/NC with related samples reported in previous studies.

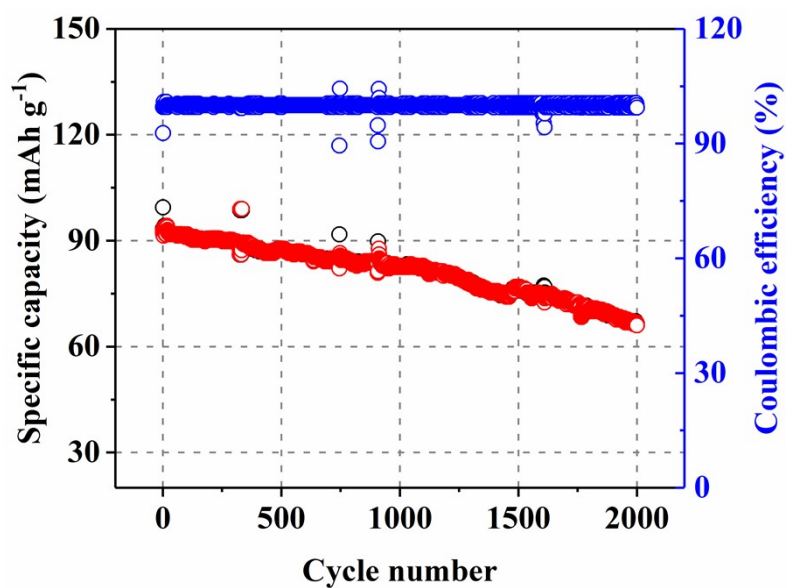

Fig. S7 Long-term cycling performance of 0.1Zr-NVP/NC at 20 A g<sup>-1</sup>.

Table S1 ICP results for the NVP/NC, 0.05Zr-NVP/NC, 0.1Zr-NVP/NC and 0.15Zr-NVP/NC.

| Samples       | Normalized element content (use P=3 for all samples) |      |       |   |
|---------------|------------------------------------------------------|------|-------|---|
|               | Na                                                   | V    | Zr    | P |
| NVP/NC        | 3.02                                                 | 2.05 | 0     | 3 |
| 0.05Zr-NVP/NC | 3.05                                                 | 1.96 | 0.048 | 3 |
| 0.1Zr-NVP/NC  | 3.06                                                 | 1.93 | 0.96  | 3 |
| 0.15Zr-NVP/NC | 3.01                                                 | 2.01 | 0.147 | 3 |

Table S2 Na<sup>+</sup> diffusion coefficients of NVP/NC, 0.05Zr-NVP/NC, 0.1Zr-NVP/NC and 0.15Zr-NVP/NC upon charging/discharging.

| Sample        | Slope   |             | D <sub>(Na<sup>+</sup>)</sub> (cm <sup>2</sup> s <sup>-1</sup> ) |                       |
|---------------|---------|-------------|------------------------------------------------------------------|-----------------------|
|               | Chargin | Discharging | Charging                                                         | Discharging           |
| NVP/NC        | 1.7692  | -1.4872     | 3.38×10 <sup>-9</sup>                                            | 2.39×10 <sup>-9</sup> |
| 0.05-ZrNVP/NC | 2.9678  | -2.6437     | 9.52×10 <sup>-9</sup>                                            | 7.56×10 <sup>-9</sup> |
| 0.1-ZrNVP/NC  | 2.2357  | -3.3276     | 2.23×10 <sup>-8</sup>                                            | 1.18×10 <sup>-8</sup> |
| 0.15-ZrNVP/NC | 4.122   | -3.254      | 1.83×10 <sup>-8</sup>                                            | 1.14×10 <sup>-8</sup> |

Table S3 The comparison of sodium storage performances between the optimized 0.1 Zr-NVP/NC and previously reported NVP cathodes.

| Samples                | Voltage range (V) | Cycling performance                                                            | Rate performance                                                                                                                                                                                                                                                                                                               | Ref |
|------------------------|-------------------|--------------------------------------------------------------------------------|--------------------------------------------------------------------------------------------------------------------------------------------------------------------------------------------------------------------------------------------------------------------------------------------------------------------------------|-----|
| Graphene-supported NVP | 2.5-3.8V          | 80.0 mAh g <sup>-1</sup> at 10 C after 300 cycles (1C=117 mA g <sup>-1</sup> ) | About 90.6 mAh g <sup>-1</sup> at 0.2 C<br>About 90.2 mAh g <sup>-1</sup> at 0.5 C<br>About 89.5 mAh g <sup>-1</sup> at 1 C<br>About 88.2 mAh g <sup>-1</sup> at 2 C<br>About 86.3 mAh g <sup>-1</sup> at 5 C<br>About 83.5 mAh g <sup>-1</sup> at 10 C<br>About 74.4 mAh g <sup>-1</sup> at 20 C (1C=117 mA g <sup>-1</sup> ) | 1   |
| Br, N co-doped NVP/C   | 2.5-4.3V          | 32.8 mAh g <sup>-1</sup> at 10 C after 500                                     | About 83.0 mAh g <sup>-1</sup> at 0.1 C                                                                                                                                                                                                                                                                                        | 2   |

|                                     |          |                                                                                          |                                                                                                                                                                                                                                                                                                                                                        |   |
|-------------------------------------|----------|------------------------------------------------------------------------------------------|--------------------------------------------------------------------------------------------------------------------------------------------------------------------------------------------------------------------------------------------------------------------------------------------------------------------------------------------------------|---|
|                                     |          | cycles<br>(1C=117 mA g <sup>-1</sup> )                                                   | About 78.9 mAh g <sup>-1</sup><br>at 0.2 C<br>About 76.4 mAh g <sup>-1</sup><br>at 0.5 C<br>About 71.2 mAh g <sup>-1</sup><br>at 1 C<br>About 65.8 mAh g <sup>-1</sup><br>at 2 C<br>About 53.2 mAh g <sup>-1</sup><br>at 5 C<br>About 41.0 mAh g <sup>-1</sup><br>at 10 C<br>About 22.9 mAh g <sup>-1</sup><br>at 20 C<br>(1C=117 mA g <sup>-1</sup> ) |   |
| NVP nanoparticle                    | 2.0-4.0V | 104.7 mAh g <sup>-1</sup> at<br>10 C after 100<br>cycles<br>(1C=117 mA g <sup>-1</sup> ) | About 114.7 mAh g <sup>-1</sup><br>at 0.1 C<br>About 112.0 mAh g <sup>-1</sup><br>at 1 C<br>About 109.6 mAh g <sup>-1</sup><br>at 3 C<br>About 104.6 mAh g <sup>-1</sup><br>at 5 C<br>About 88.7 mAh g <sup>-1</sup><br>at 10 C<br>(1C=117 mA g <sup>-1</sup> )                                                                                        | 3 |
| Titanium substituted<br>NVP/C       | 2.3-3.9V | 51.3 mAh g <sup>-1</sup> at<br>10C after 2000<br>cycles<br>(1C=117 mA g <sup>-1</sup> )  | About 101.5 mAh g <sup>-1</sup><br>at 2 C<br>About 97.5 mAh g <sup>-1</sup><br>at 5 C<br>About 92.6 mAh g <sup>-1</sup><br>at 10 C<br>About 70.8 mAh g <sup>-1</sup><br>at 20 C<br>(1C=117 mA g <sup>-1</sup> )                                                                                                                                        | 4 |
| Nitrogen doped carbon<br>coated NVP | 2.0-4.0V | 76.0 mAh g <sup>-1</sup> at<br>10 C after 3000<br>cycles<br>(1C=117 mA g <sup>-1</sup> ) | About 102.3 mAh g <sup>-1</sup><br>at 0.2 C<br>About 99.8 mAh g <sup>-1</sup><br>at 0.5 C<br>About 97.6 mAh g <sup>-1</sup><br>at 1 C<br>About 95.5 mAh g <sup>-1</sup><br>at 2 C<br>About 88.9 mAh g <sup>-1</sup>                                                                                                                                    | 5 |

|                              |          |                                                                                           |                                                                                                                                                                                                                                                                                                                |   |
|------------------------------|----------|-------------------------------------------------------------------------------------------|----------------------------------------------------------------------------------------------------------------------------------------------------------------------------------------------------------------------------------------------------------------------------------------------------------------|---|
|                              |          |                                                                                           | at 5 C<br>About 82.3 mAh g <sup>-1</sup><br>at 10 C<br>About 79.1 mAh g <sup>-1</sup><br>at 20 C<br>(1C=117 mA g <sup>-1</sup> )                                                                                                                                                                               |   |
| Fluorine doped NVP/C         | 2.0-4.2V | /                                                                                         | About 116.9 mAh g <sup>-1</sup><br>at 0.1 C<br>About 111.5 mAh g <sup>-1</sup><br>at 0.2 C<br>About 105.9 mAh g <sup>-1</sup><br>at 0.5 C<br>About 101.8 mAh g <sup>-1</sup><br>at 1 C<br>About 96.5 mAh g <sup>-1</sup><br>at 2 C<br>About 92.0 mAh g <sup>-1</sup><br>at 4 C<br>(1C=117 mA g <sup>-1</sup> ) | 6 |
| Carbon coated NVP            | 2.5-3.8V | 60.84 mAh g <sup>-1</sup> at<br>10 C after 2000<br>cycles<br>(1C=117 mA g <sup>-1</sup> ) | About 103.4 mAh g <sup>-1</sup><br>at 0.5 C<br>About 102.8 mAh g <sup>-1</sup><br>at 1 C<br>About 102.2 mAh g <sup>-1</sup><br>at 2 C<br>About 101.3 mAh g <sup>-1</sup><br>at 5 C<br>About 98.6 mAh g <sup>-1</sup><br>at 10 C<br>About 80.1 mAh g <sup>-1</sup><br>at 20 C<br>(1C=117 mA g <sup>-1</sup> )   | 7 |
| Carbon-coated nano-sized NVP | 2.0-4.0V | 48.5 mAh g <sup>-1</sup> at<br>10C after 3000<br>cycles<br>(1C=117 mA g <sup>-1</sup> )   | About 107.0 mAh g <sup>-1</sup><br>at 0.5 C<br>About 106.3 mAh g <sup>-1</sup><br>at 1 C<br>About 105.8 mAh g <sup>-1</sup><br>at 2 C<br>About 101.4 mAh g <sup>-1</sup><br>at 5 C<br>About 96.7 mAh g <sup>-1</sup><br>at 10 C<br>About 89.4 mAh g <sup>-1</sup><br>at 20 C                                   | 8 |



|                                      |          |                                                                                         |                                                              |             |
|--------------------------------------|----------|-----------------------------------------------------------------------------------------|--------------------------------------------------------------|-------------|
|                                      |          |                                                                                         | (1C=117 mA g <sup>-1</sup> )                                 |             |
|                                      |          |                                                                                         | About 103.2 mAh g <sup>-1</sup><br>at 0.5 C                  |             |
|                                      |          |                                                                                         | About 101.9 mAh g <sup>-1</sup><br>at 1 C                    |             |
|                                      |          |                                                                                         | About 100.0 mAh g <sup>-1</sup><br>at 2 C                    |             |
| Magnesium, Manganese<br>co-doped NVP | 2.4-4.3V | 86.3 mAh g <sup>-1</sup> at<br>10 C after 500<br>cycles<br>(1C=117 mA g <sup>-1</sup> ) | About 98.2 mAh g <sup>-1</sup><br>at 5 C                     | 9           |
|                                      |          |                                                                                         | About 92.9 mAh g <sup>-1</sup><br>at 10 C                    |             |
|                                      |          |                                                                                         | About 87.5 mAh g <sup>-1</sup><br>at 15 C                    |             |
|                                      |          |                                                                                         | (1C=117 mA g <sup>-1</sup> )                                 |             |
|                                      |          |                                                                                         | About 114.5 mAh g <sup>-1</sup><br>at 0.1 A g <sup>-1</sup>  |             |
|                                      |          |                                                                                         | About 109.5 mAh g <sup>-1</sup><br>at 2.0 A g <sup>-1</sup>  |             |
| Zirconium substituted<br>NVP/NC      | 2.3-4.0V | 86.16 mAh g <sup>-1</sup> at<br>10.0 A g <sup>-1</sup> after<br>3000 cycles             | About 104.3 mAh g <sup>-1</sup><br>at 10.0 A g <sup>-1</sup> | Our<br>work |
|                                      |          |                                                                                         | About 90.4 mAh g <sup>-1</sup><br>at 20.0 A g <sup>-1</sup>  |             |
|                                      |          |                                                                                         | About 80.9 mAh g <sup>-1</sup><br>at 40.0 A g <sup>-1</sup>  |             |

1. Y. H. Jung, C. H. Lim and D. K. Kim, Graphene-supported Na<sub>3</sub>V<sub>2</sub>(PO<sub>4</sub>)<sub>3</sub> as a high rate cathode material for sodium-ion batteries, *J. Mater. Chem. A*, 2013, **1**, 11350-11354.
2. Z. Wang, J. Liu, Z. Du, H. Tao and Y. Yue, Enhancing Na-ion storage in Na<sub>3</sub>V<sub>2</sub>(PO<sub>4</sub>)<sub>3</sub>/C cathodes for sodium ion batteries through Br and N co-doping, *Inorg. Chem. Front.*, 2020, **7**, 1289-1297.
3. A. H. Salehi, S. M. Masoudpanah, M. Hasheminasari, A. Yaghtin, D. Safanama, C. K. Ong, M. V. Reddy and S. Adams, A solution synthesis of Na<sub>3</sub>V<sub>2</sub>(PO<sub>4</sub>)<sub>3</sub> cathode for sodium storage by using CTAB additive, *Solid State Ionics*, 2020, **347**, 115269.
4. Y. Huang, X. Li, J. Wang, L. Miao, C. Li, J. Han and Y. Huang, Superior Na-ion storage achieved by Ti substitution in Na<sub>3</sub>V<sub>2</sub>(PO<sub>4</sub>)<sub>3</sub>, *Energy Storage Mater.*, 2018, **15**, 108-115.
5. H. Xiao, X. Huang, Y. Ren, H. Wang, J. Ding, S. Zhou, X. Ding and Y. Chen, Enhanced sodium ion storage performance of Na<sub>3</sub>V<sub>2</sub>(PO<sub>4</sub>)<sub>3</sub> with N-doped carbon by folic acid as carbon-nitrogen source, *J. Alloy. Compd.*, 2018, **732**, 454-459.
6. Y. Chen, Y. Xu, X. Sun, B. Zhang, S. He and C. Wang, F-doping and V-defect

synergetic effects on  $\text{Na}_3\text{V}_2(\text{PO}_4)_3/\text{C}$  composite: A promising cathode with high ionic conductivity for sodium ion batteries, *J. Power Sources*, 2018, **397**, 307-317.

7. L.-L. Zheng, Y. Xue, L. Deng, G.-R. Wu, S.-E. Hao and Z.-b. Wang,  $\text{Na}_3\text{V}_2(\text{PO}_4)_3$  with specially designed carbon framework as high performance cathode for sodium-ion batteries, *Ceram. Int.*, 2019, **45**, 4637-4644.
8. D. Wang, P. Cai, G.-Q. Zou, H.-S. Hou, X.-B. Ji, Y. Tian and Z. Long, Ultra-stable carbon-coated sodium vanadium phosphate as cathode material for sodium-ion battery, *Rare Metals*, 2021, **41**, 115-124.
9. X. Liu, R. Deng, X. Wei, Z. Chen, Q. Zheng, C. Xu and D. Lin,  $\text{Mg}^{2+}$  and  $\text{Mn}^{2+}$  bimetallic co-doped  $\text{Na}_3\text{V}_2(\text{PO}_4)_3$  as advanced cathode for sodium-ion batteries, *J. Alloy. Compd.*, 2022, **895**, 162511.
